# Supplementary material for: A new synthetic entry to phosphinophosphinidene complexes. Synthesis and structural characterisation of the first side-on bonded and the first terminally bonded phosphinophosphinidene zirconium complexes [μ-(1,2∶2-η-tBu2PP){Zr(Cl)Cp2}2] and [{Zr(PPhMe2)Cp2}(η1-P–PtBu2)]
Source: Royal Society of Chemistry journal article supplement (doi:10.1039/b409673h), 2004-01-01
Supplement: b409673h.pdf [file b409673h.pdf]

**A New Synthetic Entry to Phosphinophosphinidene Complexes. Synthesis and Structural Characterisation of the First Side-on Bonded and the First Terminally Bonded Phosphinophosphinidene Zirconium Complexes**  
 **$[\mu-(1,2:2-\eta\text{-}^t\text{Bu}_2\text{P}=\text{P})\{\text{Zr}(\text{Cl})\text{Cp}_2\}_2]$  and  $[\{\text{Zr}(\text{PPhMe}_2)\text{Cp}_2\}(\eta^1\text{-P-P}^t\text{Bu}_2)]$**

Jerzy Pikies<sup>b\*</sup>, Elke Baum<sup>a</sup>, Eberhard Matern<sup>a</sup>, Jaroslaw Chojnacki, Rafał Grubba<sup>b</sup>, Andrzej Robaszkiewicz<sup>b</sup>.

<sup>a</sup> Institut für Anorganische Chemie der Universität (TH), Engesserstr. 15 Geb.Nr. 30.45. D-76128 Karlsruhe.

<sup>b</sup> Chemical Faculty, Gdańsk University of Technology, ul. Narutowicza 11/12, 80-952 Gdańsk, Poland

\* Fax: +48 58 3472694; Tel: +48 58 3472622; E-mail: pikies@chem.pg.gda.pl

**Electronic Supplementary Information**

**Experimental**

All manipulations were performed in flame-dried Schlenk type glassware on a vacuum line. THF and toluene were dried over Na/benzophenone and distilled under nitrogen. Pentane was dried over Na/benzophenone/diglyme and distilled under nitrogen. <sup>31</sup>P NMR spectra were recorded on Bruker AC250 and AMX300 spectrometers (external standard 85% H<sub>3</sub>PO<sub>4</sub>).

<sup>t</sup>Bu<sub>2</sub>P–P(SiMe<sub>3</sub>)Li·2THF was prepared according to literature procedures [G. Fritz, T. Vaahs, J. Härer, *Z. Anorg. Allg. Chem.*, 1987, **552**, 11].

**Synthesis of  $[\mu-(1,2:2-\eta\text{-}^t\text{Bu}_2\text{P}-\text{P})\{\text{Zr}(\text{Cl})\text{Cp}_2\}_2]$  (**1**).**

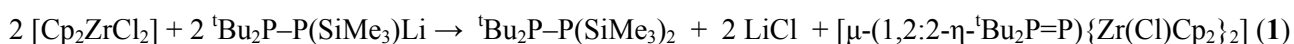

A solution of 0.090 g (0.225 mmol) <sup>t</sup>Bu<sub>2</sub>P–P(SiMe<sub>3</sub>)Li·2THF in 3 ml THF was slowly added at room temperature to a solution of 0.055 g (0.19 mmol) Cp<sub>2</sub>ZrCl<sub>2</sub> in 2 ml THF. The mixture immediately turned brown, was stirred for 1 h and then evacuated at 2·10<sup>-3</sup> Torr for 3 h. The residue was dissolved in about 5 ml THF, filtered and investigated by <sup>31</sup>P{<sup>1</sup>H} NMR. Then the volume was reduced to about 1 ml and the concentrate stored for 3 days at 4° C. About 0.021 g of dark red crystals of **1** precipitated (32%). <sup>31</sup>P NMR of **1** (THF, C<sub>6</sub>D<sub>6</sub>, 20° C) δ = P1 93.9 ppm, d, no P-H coupling; P2 -1.2 ppm, d of m, small <sup>3</sup>J(P-H) coupling, <sup>1</sup>J(P-P) = -520.6 Hz.

<sup>1</sup>H NMR of **1** δ = 1.543 d, <sup>3</sup>J(P-H) = 13.8 Hz, (CH<sub>3</sub>)<sub>3</sub>C, (from <sup>1</sup>H-<sup>31</sup>P-COSY experiment).

EI MS (EI = 70 eV, QT = 180°C, DI = 200°C, Mass Spectrometer MAT8200) : m/z 626.9 (C<sub>23</sub>H<sub>36</sub>Cl<sub>2</sub>P<sub>2</sub>Zr<sub>2</sub>, 0.5%), 592.9(0.5%), 515(1%), 488.9 (C<sub>18</sub>H<sub>31</sub>P<sub>2</sub>Zr<sub>2</sub>, 2%), 462.8(8%), 341.9 (C<sub>14</sub>H<sub>22</sub>P<sub>2</sub>Zr, 12%), 293.9 (100%).

Elemental analysis: C 46.8 %, H 5.68 %, C<sub>28</sub>H<sub>38</sub>Cl<sub>2</sub>P<sub>2</sub>Zr<sub>2</sub> calc. C 48.74%, H 5.55 %.

The <sup>31</sup>P{<sup>1</sup>H} NMR study upon the reaction mixture from the synthesis of **1**.

**1**) δ = P1 93.9 ppm (d), P2 -1.2 ppm (d), <sup>1</sup>J(P-P) = -520.6 Hz, [μ-(1,2:2-η-<sup>t</sup>Bu<sub>2</sub>P<sub>2</sub>=P1){Zr(Cl)Cp<sub>2</sub>}]<sub>2</sub> (**1**).

**a**) δ = P1 44.6 ppm (d), P2 -200.7 ppm (d), <sup>1</sup>J(P-P) = -399.6 Hz, <sup>t</sup>Bu<sub>2</sub>P1-P2(SiMe<sub>3</sub>)<sub>2</sub>.

**b**) δ(P) 21.0 (s), <sup>t</sup>Bu<sub>2</sub>PH formed *via* splitting of the P-P bond in the <sup>t</sup>Bu<sub>2</sub>P-P group.

**c**) δ = P1 470.5 ppm (d), P2 72.2 ppm (d), <sup>1</sup>J(P-P) = -331.9 Hz.

**d**) δ = P1 67.3 ppm (d), P2 -9.1 ppm (d), <sup>1</sup>J(P-P) = -521.6 Hz, probably [(1,2-η-<sup>t</sup>Bu<sub>2</sub>P1=P2-SiMe<sub>3</sub>){Zr(Cl)Cp<sub>2</sub>}]<sub>2</sub>. A <sup>31</sup>P NMR experiment established no direct <sup>1</sup>J(P-H) coupling, a small <sup>3</sup>J(P-H) coupling of P1 and a very small <sup>3</sup>J(P-H) coupling at P2, very good soluble in pentane (dark red solution).

**e**) δ = P1 19.1 ppm (d), P2 -197.6 ppm (d), <sup>1</sup>J(P-P) = -189.5 Hz, <sup>1</sup>J(P-H) = 189.2 Hz <sup>t</sup>Bu<sub>2</sub>P1-P2(SiMe<sub>3</sub>)H.

**f**) δ = P1 54.1 ppm (d), P2 -98.6 ppm (d,d), P3 -178.9 ppm (d,d), <sup>1</sup>J(P1-P2) = -316.6 Hz, <sup>1</sup>J(P2-P3) = -270.1 Hz, <sup>1</sup>J(P1-P3) = 42.0 Hz.

The stability of solutions of **1** in THF is limited. **1** precipitates from the THF reaction mixture, however an attempt to crystallise **1** from a solution in THF resulted in the formation of a significant amount of decomposition products.

**Synthesis of [Zr(PPhMe<sub>2</sub>)Cp<sub>2</sub>](η-P-P<sup>t</sup>Bu<sub>2</sub>) (**2**).**

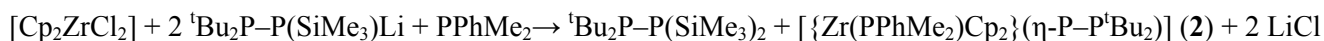

A solution of 0.411 g (1.03 mmol) <sup>t</sup>Bu<sub>2</sub>-P(SiMe<sub>3</sub>)Li·2THF in 2 ml DME was added to 0.7 ml (5.07 mmol) PhPMe<sub>2</sub> and 0.156 g (0.53 mmol) [Cp<sub>2</sub>ZrCl<sub>2</sub>] in 2 ml DME at about -35 °C. A dark red solution formed immediately. After stirring for 1 h, the reaction mixture was studied with <sup>31</sup>P{<sup>1</sup>H} NMR, then the solvent was evaporated, the residue dissolved in 8 ml pentane, filtered, and the brown solution concentrated to about 4 ml. While standing for 5 days, the color of the solution turned to dark green and

# Supplementary Material (ESI) for Chemical Communications

# This journal is © The Royal Society of Chemistry 2004

finally to dark blue, and dark blue crystals of **2** (shaped like blocks) precipitated (0.12 g, 44% yield). An attempt to dissolve **2** in THF- $d_8$  led to a partial decomposition of this compound.

$^{31}\text{P}\{^1\text{H}\}$  NMR of [ $\{\text{Zr}(\text{P}3\text{PhMe}_2)\text{Cp}_2\}(\eta\text{-P1-P}2^t\text{Bu}_2)$ ] (**2**);  $\delta(\text{P1})$  728.2 (d,d),  $\delta(\text{P2})$  64.6 (d),  $\delta(\text{P3})$  6.5 (d),  $^1\text{J}(\text{P1-P2}) = -283.7$  Hz,  $^2\text{J}(\text{P1-P3}) = 15.3$  Hz.

Anal. Calc. C 58.29%; H 7.35%. Found C 58.9%; H 7.7%.

The  $^{31}\text{P}\{^1\text{H}\}$  NMR study upon the reaction mixture from the synthesis of **2**.

**2**)  $\delta(\text{P1})$  728.2 (d,d),  $\delta(\text{P2})$  64.6 (d),  $\delta(\text{P3})$  6.5 (d),  $^1\text{J}(\text{P1-P2}) -283.7$  Hz,  $^2\text{J}(\text{P1-P3}) 15.3$  Hz;

[ $\{\text{Zr}(\text{P}3\text{PhMe}_2)\text{Cp}_2\}(\eta\text{-P1-P}2^t\text{Bu}_2)$ ] (**2**)

**a**)  $\delta = \text{P1}$  44.3 ppm (d),  $\text{P2}$  -200.6 ppm (d),  $^1\text{J}(\text{P-P}) = -400.5$  Hz,  $^t\text{Bu}_2\text{P1-P}2(\text{SiMe}_3)_2$ .

**b**)  $\delta(\text{P})$  21.0 (s),  $^t\text{Bu}_2\text{PH}$ .

**c**)  $\delta(\text{P1})$  468.7 (d),  $\delta(\text{P2})$  72.8 (d),  $^1\text{J}(\text{P-P}) = -331.9$  Hz.

**g**)  $\delta(\text{P1})$  47.6 (d),  $\delta(\text{P2})$  -242.3 ppm (d),  $^1\text{J}(\text{P-P}) = -274.7$  Hz;  $^t\text{Bu}_2\text{P1-P}2(\text{SiMe}_3)\text{Li}$  (substract).

**h**)  $\delta(\text{P1})$  560.4 (d),  $\delta(\text{P2})$  53.7 (d),  $^1\text{J}(\text{P-P}) = -339.5$  Hz.

**i**)  $\delta(\text{P1})$  55.7 (d),  $\delta(\text{P2})$  -123.9 (d,d),  $\delta(\text{P3})$  -197.6 (d,d),  $^1\text{J}(\text{P1-P2}) = -316.6$  Hz,  $^1\text{J}(\text{P2-P3}) = -297.5$  Hz,  $^1\text{J}(\text{P1-P3}) = 28.3$  Hz. No  $^1\text{J}(\text{P-H})$  coupling was observed. This data set is similar to **f** (synthesis of **1**).

Although solutions of **2** in DME are indefinitely stable in the presence of an excess of  $\text{PPhMe}_2$  at ambient temperature, an attempt to dissolve **2** in THF- $d_8$  resulted in a decomposition of a part of the compound and formation of a significant amount of free  $\text{PPhMe}_2$  together with a small amount of  $^t\text{Bu}_2\text{PH}$ . It's a noteworthy property of **2** how easily it loses the tertiary phosphane ligand and undergoes further decompositions.

**Crystal data of 1:**  $\text{C}_{28}\text{H}_{38}\text{Cl}_2\text{P}_2\text{Zr}_2$ ;  $T = 170(2)$  K; wavelength 71.073 pm (Mo  $K\alpha$ ); monoclinic,  $P2_1/n$  (No. 14),  $a = 1074.89(4)$  pm,  $b = 2394.32(10)$  pm,  $c = 1155.29(5)$  pm,  $\beta = 102.026(3)^\circ$ ;  $Z = 4$ ; absorption coefficient  $1.026\text{ mm}^{-1}$ ; crystal size  $0.4 \times 0.35 \times 0.15\text{ mm}^3$ ;  $\theta$  range for data collection  $1.70 - 25.50^\circ$ , reflections collected = 15035, unique reflections = 5063; completeness (to  $\theta = 25.50^\circ$ ) = 93.8%; data = 4713, restraints = 0, parameters = 313; final R indices [ $I > 2\sigma(I)$ ]  $R1 = 0.0206$ ,  $wR2 = 0.0530$ ; R indices (all data)  $R1 = 0.0228$ ,  $wR2 = 0.0539$  (all data); H atoms refined as riding on the respective heavy atoms; diffractometer Stoe IPDS. **CCDC 225538**

**Crystal data of 2:**  $\text{C}_{26}\text{H}_{39}\text{P}_3\text{Zr}$ ;  $T = 150(0.2)$  K; wavelength 71.073 pm (Mo  $K\alpha$ ); triclinic,  $P\bar{1}$  (No. 2),  $a = 931.2(2)$  pm,  $b = 1157.4(2)$  pm,  $c = 2522.0(5)$  pm,  $\alpha = 78.91(3)^\circ$ ,  $\beta = 87.11(3)^\circ$ ;  $\gamma = 85.26(3)^\circ$ ,  $Z = 4$ ; Two molecules present in the asymmetric unit, absorption coefficient  $0.606\text{ mm}^{-1}$ ; crystal size  $0.5 \times 0.4 \times 0.3\text{ mm}^3$ ;  $\theta$  range for data collection  $1.65 - 25.50^\circ$ , reflections collected = 10154, unique reflections

# Supplementary Material (ESI) for Chemical Communications

# This journal is © The Royal Society of Chemistry 2004

= 9876; completeness (to  $\theta = 25.50^\circ$ ) = 100.00%; data = 9876, restraints = 0, parameters = 526; final R indices [ $I > 2\sigma(I)$ ] R1 = 0.1011, wR2 = 0.2533; R indices (all data) R1 = 0.1659, wR2 = 0.3115 (all data); all H atoms refined isotropically as riding on heavy atoms; diffractometer KUMA KM4. **CCDC 232586**

Table 1. Selected bond lengths [Å] and angles [deg] for both molecules of **2**.

first molecule:

|             |            |
|-------------|------------|
| Zr(1)-P(1)  | 2.488 (3)  |
| Zr(1)-C(10) | 2.491 (13) |
| Zr(1)-C(6)  | 2.502 (13) |
| Zr(1)-C(7)  | 2.503 (13) |
| Zr(1)-C(8)  | 2.512 (13) |
| Zr(1)-C(9)  | 2.514 (14) |
| Zr(1)-C(5)  | 2.524 (12) |
| Zr(1)-C(1)  | 2.524 (11) |
| Zr(1)-C(2)  | 2.532 (12) |
| Zr(1)-C(4)  | 2.536 (13) |
| Zr(1)-C(3)  | 2.548 (13) |
| Zr(1)-P(3)  | 2.734 (3)  |
| P(1)-P(2)   | 2.200 (5)  |
| P(2)-C(23)  | 1.909 (12) |
| P(2)-C(19)  | 1.949 (13) |
| P(3)-C(11)  | 1.822 (12) |
| P(3)-C(13)  | 1.836 (12) |
| P(3)-C(12)  | 1.836 (12) |

second molecule:

|             |            |
|-------------|------------|
| Zr(2)-C(39) | 2.478 (14) |
| Zr(2)-P(4)  | 2.482 (3)  |
| Zr(2)-C(38) | 2.500 (14) |
| Zr(2)-C(35) | 2.504 (14) |
| Zr(2)-C(31) | 2.509 (14) |
| Zr(2)-C(37) | 2.508 (13) |
| Zr(2)-C(32) | 2.521 (14) |
| Zr(2)-C(36) | 2.528 (12) |
| Zr(2)-C(34) | 2.533 (13) |
| Zr(2)-C(30) | 2.536 (14) |
| Zr(2)-C(33) | 2.541 (14) |
| Zr(2)-P(6)  | 2.738 (3)  |
| P(4)-P(5)   | 2.215 (5)  |
| P(5)-C(52)  | 1.913 (13) |
| P(5)-C(48)  | 1.931 (12) |
| P(6)-C(47)  | 1.813 (13) |
| P(6)-C(40)  | 1.827 (13) |
| P(6)-C(46)  | 1.835 (13) |

first molecule:

|                  |            |
|------------------|------------|
| P(1)-Zr(1)-C(10) | 141.7 (4)  |
| P(1)-Zr(1)-C(6)  | 115.4 (4)  |
| P(1)-Zr(1)-C(7)  | 87.7 (3)   |
| P(1)-Zr(1)-C(8)  | 91.1 (3)   |
| P(1)-Zr(1)-C(9)  | 122.6 (3)  |
| P(1)-Zr(1)-C(5)  | 77.9 (3)   |
| P(1)-Zr(1)-C(1)  | 103.8 (3)  |
| P(1)-Zr(1)-C(2)  | 131.3 (3)  |
| P(1)-Zr(1)-C(4)  | 86.3 (3)   |
| P(1)-Zr(1)-C(3)  | 117.6 (4)  |
| P(1)-Zr(1)-P(3)  | 88.49 (10) |
| C(10)-Zr(1)-P(3) | 103.7 (4)  |
| C(6)-Zr(1)-P(3)  | 131.9 (3)  |

# Supplementary Material (ESI) for Chemical Communications

# This journal is © The Royal Society of Chemistry 2004

|                  |            |
|------------------|------------|
| C(7)-Zr(1)-P(3)  | 118.4(3)   |
| C(8)-Zr(1)-P(3)  | 86.0(3)    |
| C(9)-Zr(1)-P(3)  | 77.7(3)    |
| C(5)-Zr(1)-P(3)  | 114.3(3)   |
| C(1)-Zr(1)-P(3)  | 132.9(3)   |
| C(2)-Zr(1)-P(3)  | 108.8(3)   |
| C(4)-Zr(1)-P(3)  | 83.4(3)    |
| C(3)-Zr(1)-P(3)  | 80.4(3)    |
| P(2)-P(1)-Zr(1)  | 115.53(16) |
| C(11)-P(3)-Zr(1) | 115.7(4)   |
| C(13)-P(3)-Zr(1) | 118.0(4)   |
| C(12)-P(3)-Zr(1) | 115.8(4)   |
| second molecule: |            |
| C(39)-Zr(2)-P(4) | 140.6(4)   |
| P(4)-Zr(2)-C(38) | 122.9(3)   |
| P(4)-Zr(2)-C(35) | 114.7(4)   |
| P(4)-Zr(2)-C(31) | 101.2(4)   |
| P(4)-Zr(2)-C(37) | 91.5(3)    |
| P(4)-Zr(2)-C(32) | 77.6(3)    |
| P(4)-Zr(2)-C(36) | 87.8(3)    |
| P(4)-Zr(2)-C(34) | 120.4(4)   |
| P(4)-Zr(2)-C(30) | 130.3(4)   |
| P(4)-Zr(2)-C(33) | 88.6(4)    |
| C(39)-Zr(2)-P(6) | 105.2(4)   |
| P(4)-Zr(2)-P(6)  | 88.58(11)  |
| C(38)-Zr(2)-P(6) | 79.0(3)    |
| C(35)-Zr(2)-P(6) | 132.9(4)   |
| C(31)-Zr(2)-P(6) | 132.5(3)   |
| C(37)-Zr(2)-P(6) | 87.7(3)    |
| C(32)-Zr(2)-P(6) | 110.2(3)   |
| C(36)-Zr(2)-P(6) | 119.4(3)   |
| C(34)-Zr(2)-P(6) | 81.9(3)    |
| C(30)-Zr(2)-P(6) | 111.3(4)   |
| C(33)-Zr(2)-P(6) | 81.3(4)    |
| P(5)-P(4)-Zr(2)  | 116.87(17) |
| C(47)-P(6)-Zr(2) | 116.1(5)   |
| C(40)-P(6)-Zr(2) | 118.5(4)   |
| C(46)-P(6)-Zr(2) | 115.7(4)   |

---
